# Supplementary material
Source: Springer Nature journal article supplement (https://www.springermedizin.de/resource/supplementary/13011_2009_127_MOESM4_ESM.pdf/9628524)

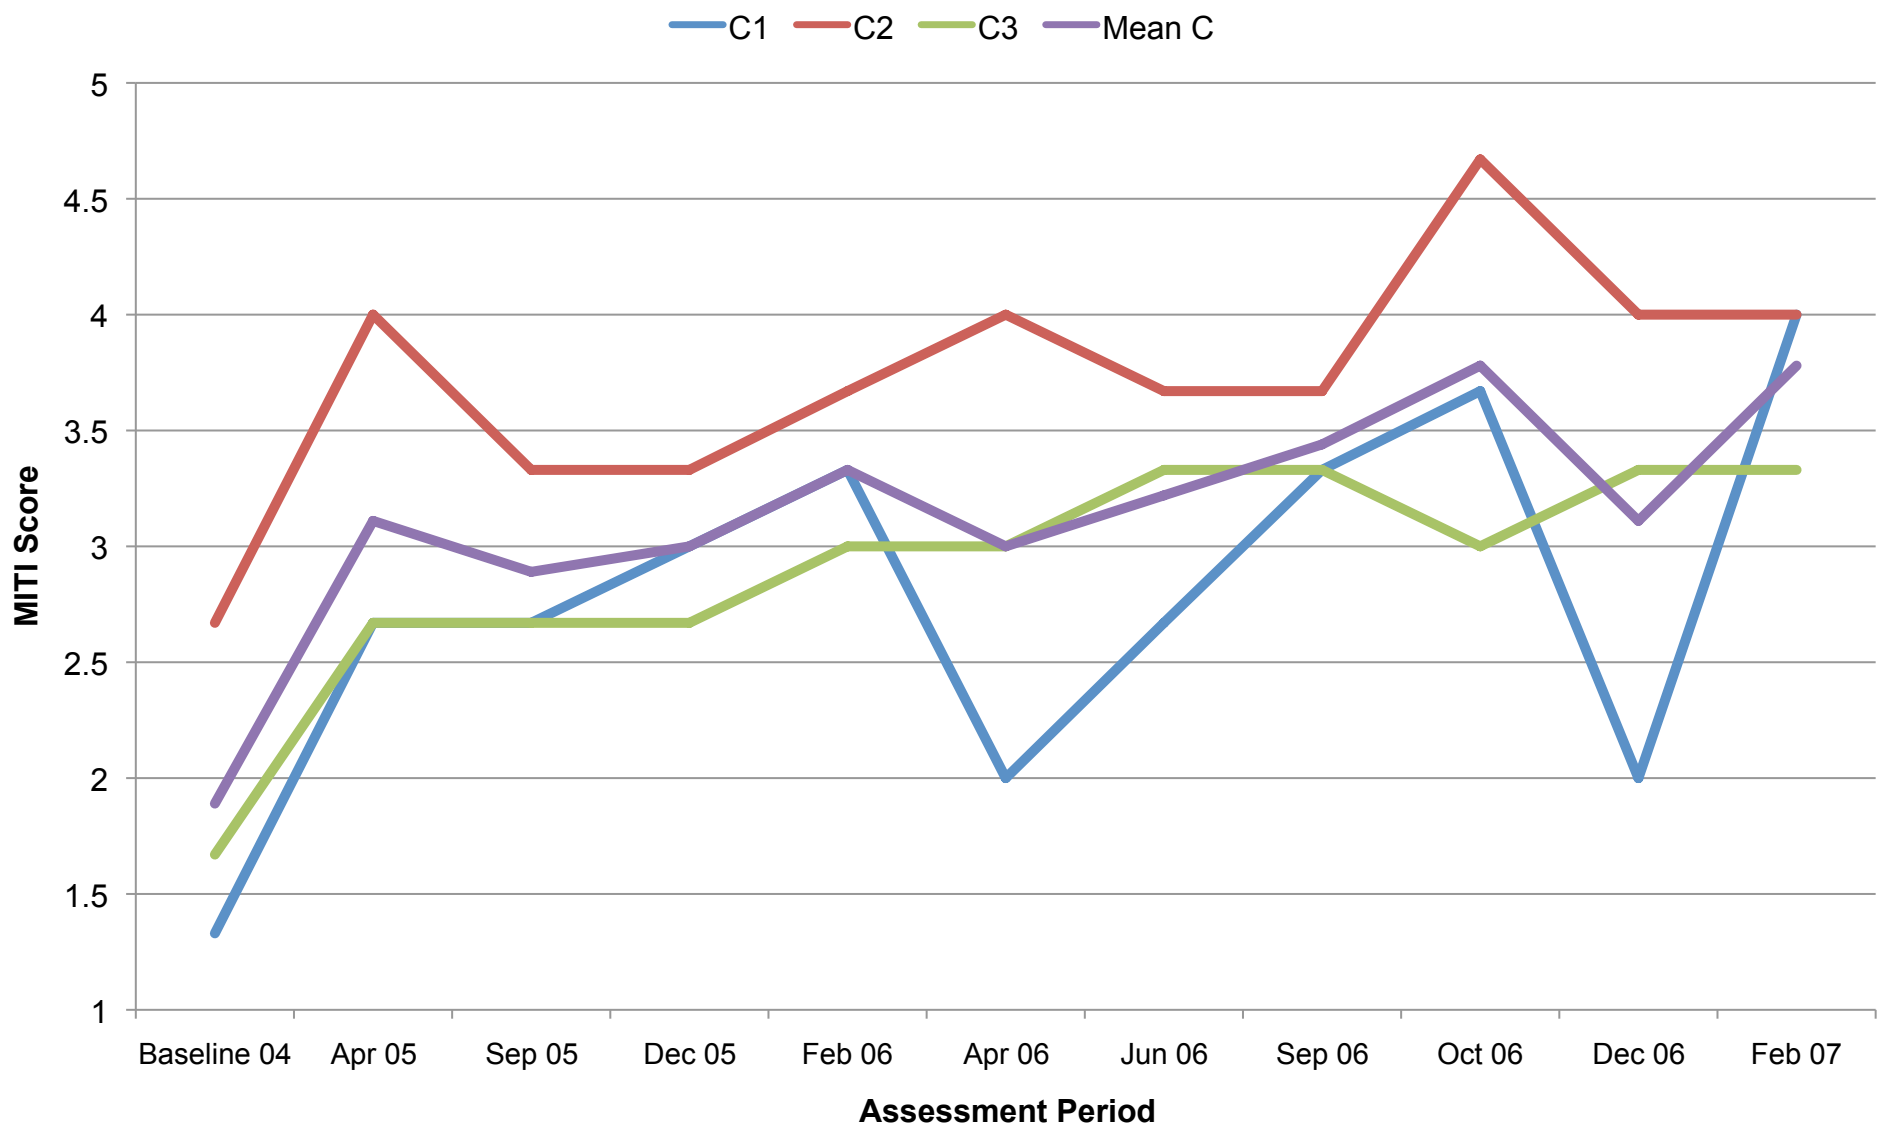

Supplement: MOESM4 [file 9628524]
